# Supplementary material
Source: PubMed Central journal article supplement (PMC10520840)
Supplement: jamapediatr-e233651-s001.pdf [file jamapediatr-e233651-s001.pdf]

## Data Sharing Statement

Mezoff. Content Expert–Built Documentation Tools and Time to Encounter Closure. *JAMA Pediatr.* Published September 25, 2023. doi:10.1001/jamapediatrics.2023.3651

### Data

**Data available:** No

### Additional Information

**Explanation for why data not available:** With limited set of patients, granular encounter data set, and without IRB approval (as is appropriate for quality work), I am concerned data sharing increases risk of subject identification. Benefit of making this data set for quality improvement available does not outweigh risks to patients in authors mind.
